# Supplementary material
Source: Research Square preprint supplement (doi:10.21203/rs.3.rs-9431924/v1)
Supplement: Supplementary file 1 [file de5c560c5c343a8fd10865bc.docx]

**Supplementary**


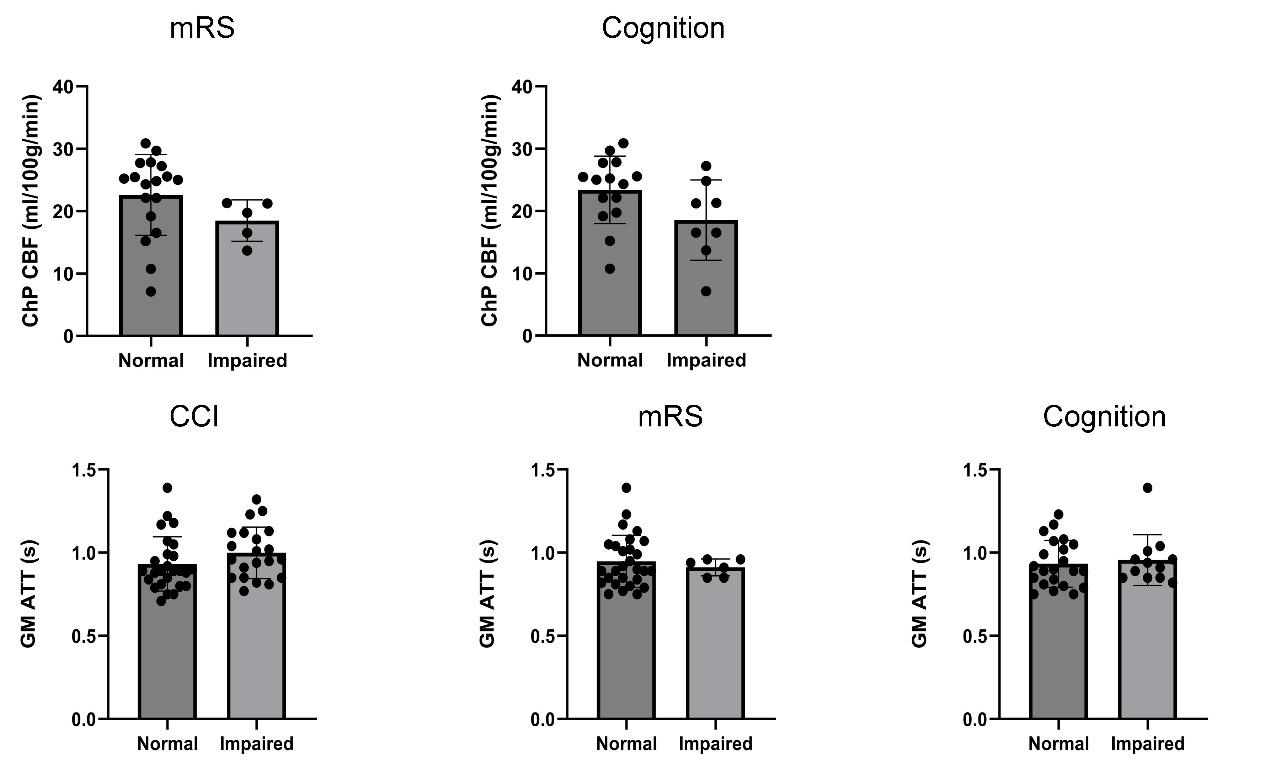


Figure S1. The relationship between cerebral hemodynamic metrics and clinical symptom severity.
